# Supplementary material
Source: MDPI journal article supplement (https://www.mdpi.com/2073-4433/14/2/333)
Supplement: s1 [file s1]

# Analysis of Large-Scale Environmental Features during Maximum Intensity of Tropical Cyclones Using Reanalysis Data

Mohan Murali Krishna Gorja <sup>1</sup>, Venkata Sai Gulakaram <sup>2</sup>, Naresh Krishna Vissa <sup>1,\*</sup>, Yesubabu Viswanadhapalli <sup>3</sup> and Bhishma Tyagi <sup>1</sup>

- 1 Department of Earth and Atmospheric Sciences, National Institute of Technology Rourkela, Rourkela 769008, India
- 2 Indian National Centre for Ocean Information Services (INCOIS), Hyderabad 500090, India
- 3 Weather and Climate Research Group, National Atmospheric Research Laboratory, Gadanki, Tirupati 517112, India

\* Correspondence: vissan@nitrkl.ac.in or vissanaresh@gmail.com; Tel.: +91-6612462940

#Supporting information include Figure S1 – S5 and Table S1 – S2.

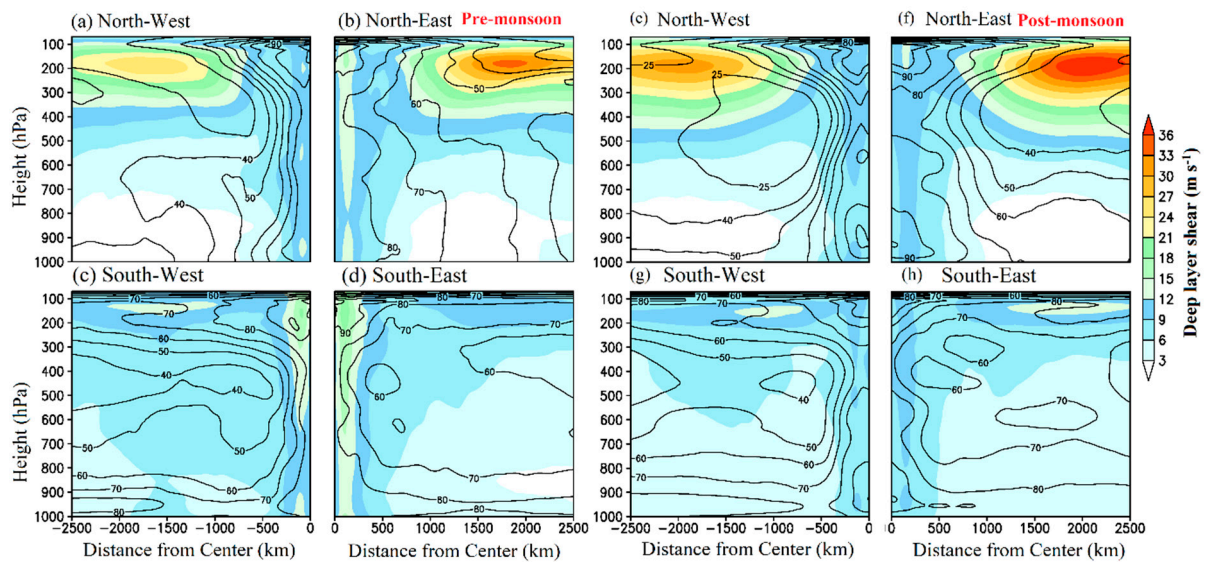

**Figure S1.** Radial-height cross-section of azimuthally averaged divergence (shaded,  $\times 10^{-5} \text{ s}^{-1}$ ) and wind fields (streamlines) shown in each quadrant of the north-west (NW), north-east (NE), south-west (SW), and south-east (SE) from the vortex center using ERA5 data for pre-monsoon (a-d) and post-monsoon (e-h).

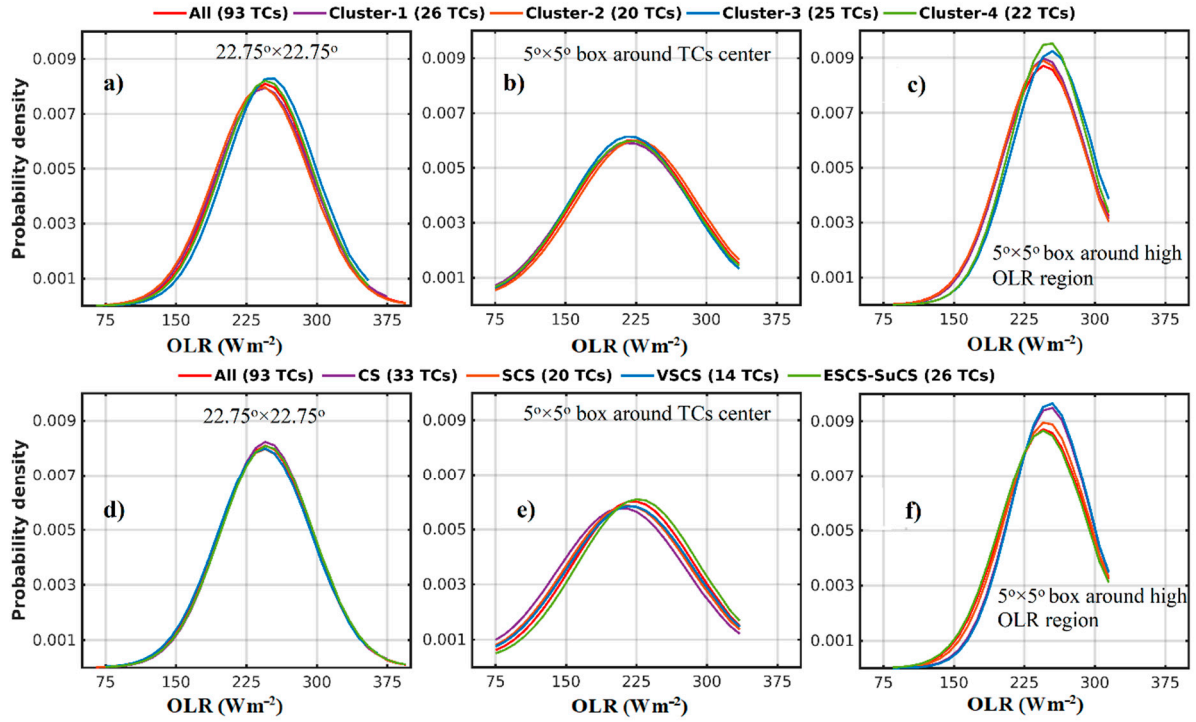

**Figure S2.** Probability density distribution of outgoing longwave radiation (OLR,  $\text{Wm}^{-2}$ ) based on (a,b,c) Movement (clusters) and (d,e,f) Intensity (Categories: Cyclonic systems (CS), Severe cyclonic systems (SCS), Very severe cyclonic systems (VSCS) and Extremely severe and Super cyclonic systems (ESCS-SuCS)).

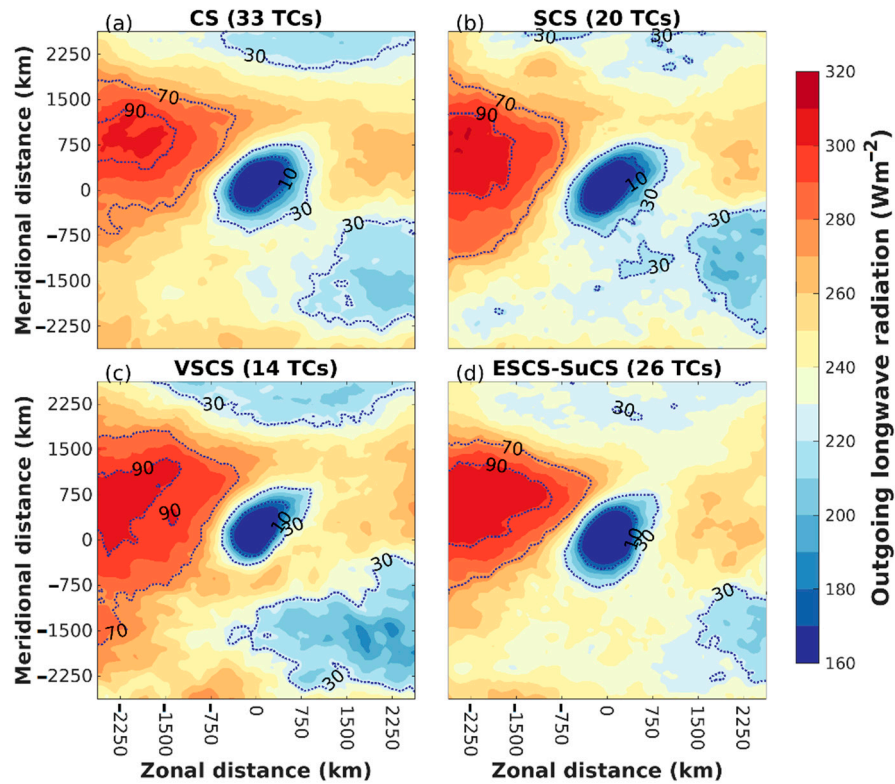

**Figure S3.** Composites of outgoing longwave radiation (OLR,  $\text{Wm}^{-2}$ ) for a) Cyclonic systems (CS), b) Severe cyclonic systems (SCS), c) Very severe cyclonic systems (VSCS), and d) Extremely severe and Super cyclonic systems (ESCS-SuCS). The dotted contours represents percentile values. The value in the parenthesis represents the number of tropical cyclones obtained of each category.

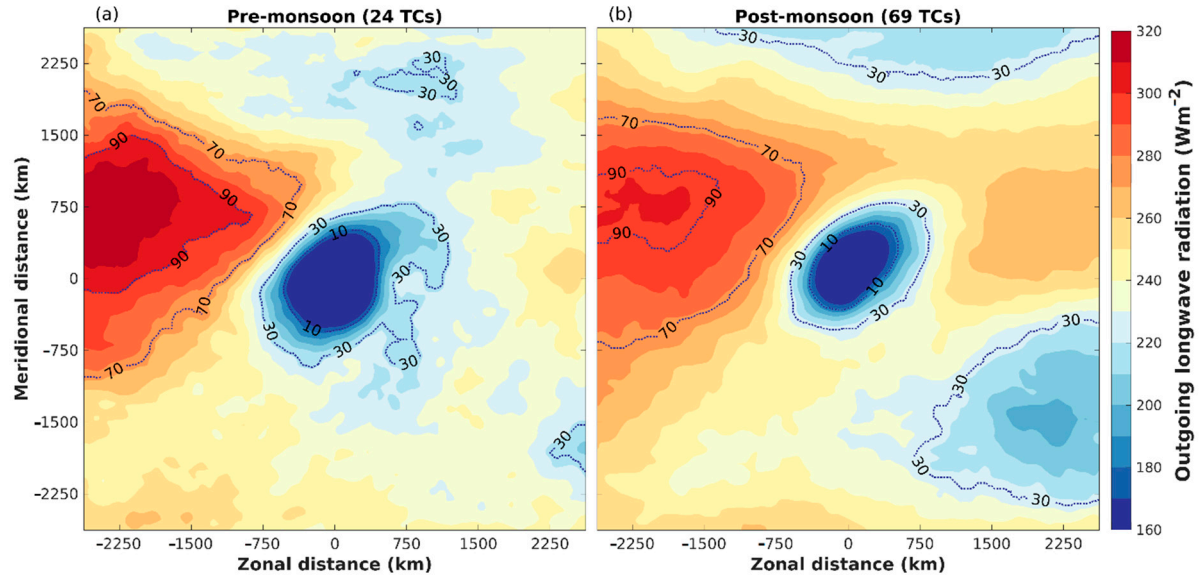

**Figure S4.** Composites of outgoing longwave radiation (OLR,  $\text{Wm}^{-2}$ ) for a) Pre-monsoon TCs, b) Post-monsoon TCs. The dotted contours represents percentile values. The value in the parenthesis represents the number of tropical cyclones obtained during each season.

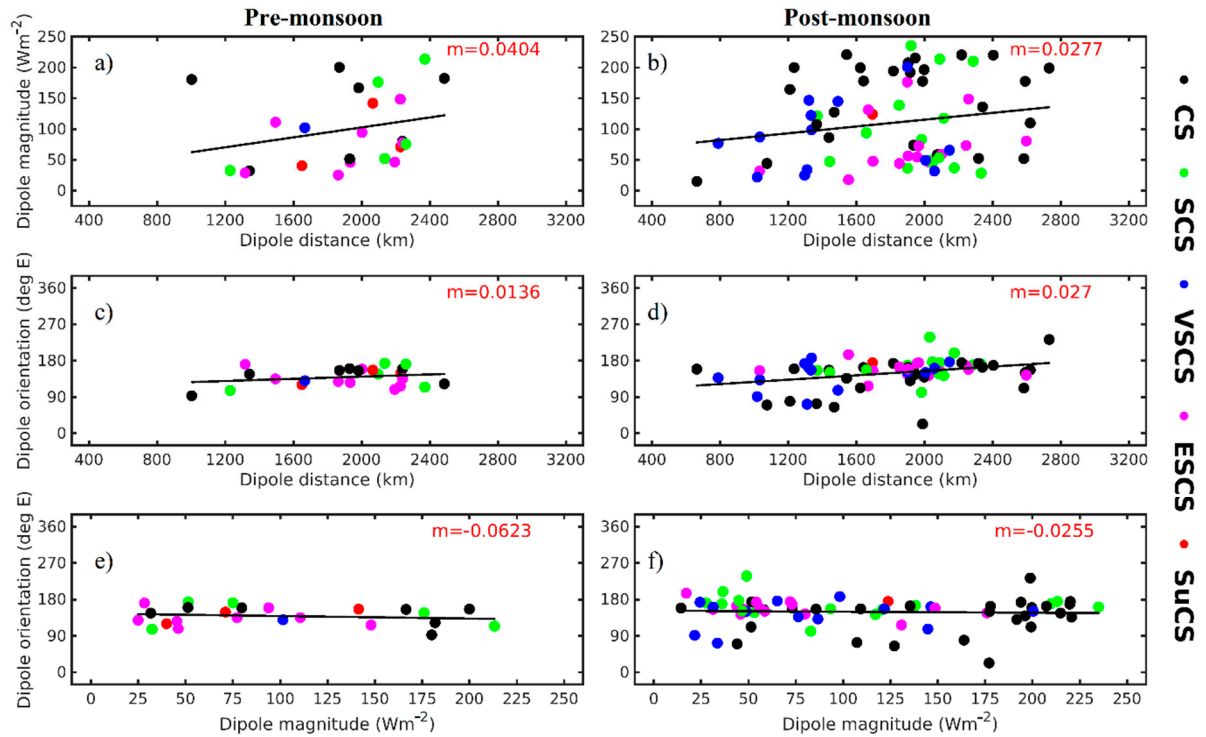

**Figure S5.** Scatterplot represents the linear variation of dipole characteristics (a,b) dipole distance vs dipole magnitude, (c,d) dipole distance vs dipole orientation, and (e,f) dipole magnitude vs dipole orientation between pre- & post- monsoon. Different colours represents the each category of TCs.

**Table S1.** Frequency of TCs grouped into each cluster showing intensity and seasonal wise.

| TC Category | Cluster-1 | Cluster-2 | Cluster-3 | Cluster-4 | Pre-monsoon | Post-monsoon |
|-------------|-----------|-----------|-----------|-----------|-------------|--------------|
| CS          | 10        | 4         | 10        | 9         | 7           | 26           |

|              |    |    |    |    |    |    |
|--------------|----|----|----|----|----|----|
| <b>SCS</b>   | 5  | 4  | 5  | 6  | 5  | 15 |
| <b>VSCS</b>  | 1  | 4  | 5  | 4  | 1  | 13 |
| <b>ESCS</b>  | 10 | 5  | 5  | 2  | 8  | 14 |
| <b>SuCS</b>  | 0  | 3  | 0  | 1  | 3  | 1  |
| <b>Total</b> | 26 | 20 | 25 | 22 | 24 | 69 |

*Table S2.* Seasonal wise mean and standard deviation (SD) of Outgoing longwave radiation (OLR) dipole metrics from observation (ERA5) data.

| <b>Season /<br/>Dipole characteristics</b> | <b>Magnitude</b> |    | <b>Distance</b> |     | <b>Orientation</b> |    |
|--------------------------------------------|------------------|----|-----------------|-----|--------------------|----|
|                                            | Mean             | SD | Mean            | SD  | Mean               | SD |
| <b>Pre-monsoon</b>                         | 248              | 14 | 1929            | 422 | 139                | 23 |
| <b>Post-monsoon</b>                        | 230              | 10 | 1735            | 506 | 149                | 36 |
